# Supplementary material
Source: PubMed Central journal article supplement (PMC1360556)
Supplement: pnas_0509011103_12.pdf [file pnas_0509011103_12.pdf]

**Table 3. Luminescence data and related parameters for  $1^{6+}$  in deaerated acetonitrile solution**

| $T$ , K | $\tau_0$ , ns | $\tau$ , ns | $k_{\text{et}}$ , $\text{s}^{-1}$       | $\Phi_{\text{et}}$ |
|---------|---------------|-------------|-----------------------------------------|--------------------|
| 284     | 1030          | 890 (870)   | $1.5 \times 10^5$ ( $1.8 \times 10^5$ ) | 0.14 (0.15)        |
| 288     | 990           | 850 (830)   | $1.7 \times 10^5$ ( $2.0 \times 10^5$ ) | 0.14 (0.16)        |
| 293     | 900           | 780 (760)   | $1.7 \times 10^5$ ( $2.1 \times 10^5$ ) | 0.14 (0.16)        |
| 299     | 820           | 710 (680)   | $1.9 \times 10^5$ ( $2.4 \times 10^5$ ) | 0.13 (0.17)        |
| 303     | 770           | 650 (620)   | $2.5 \times 10^5$ ( $3.1 \times 10^5$ ) | 0.16 (0.19)        |

The values of  $\tau_0$  correspond to the model compound  $3^{2+}$ . The corresponding data for  $2^{6+}$  are reported in parentheses.
