# Supplementary material
Source: PubMed Central journal article supplement (PMC1360556)

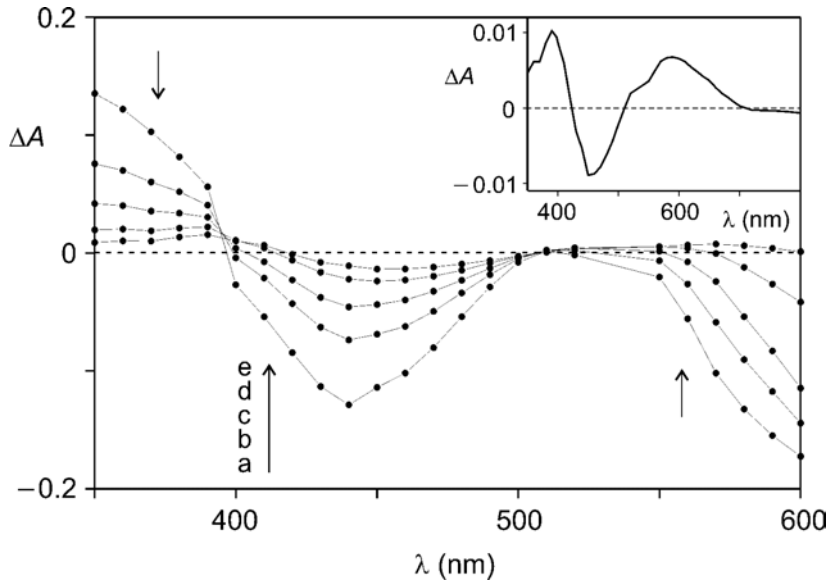

Supplement: pnas_0509011103_1.pdf [file pnas_0509011103_1.pdf]

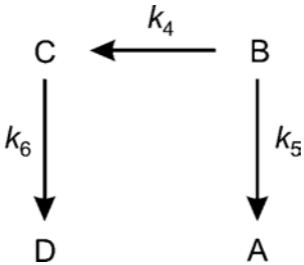

Supplement: pnas_0509011103_10.pdf [file pnas_0509011103_10.pdf]

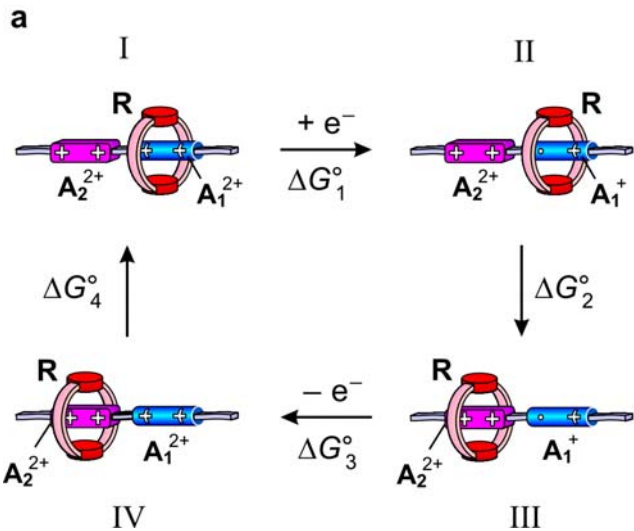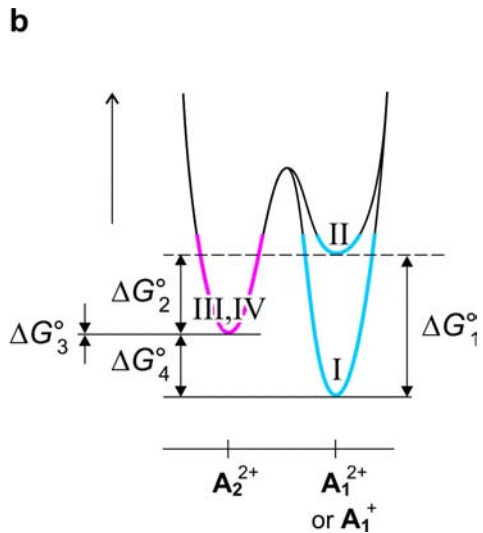

Supplement: pnas_0509011103_11.pdf [file pnas_0509011103_11.pdf]

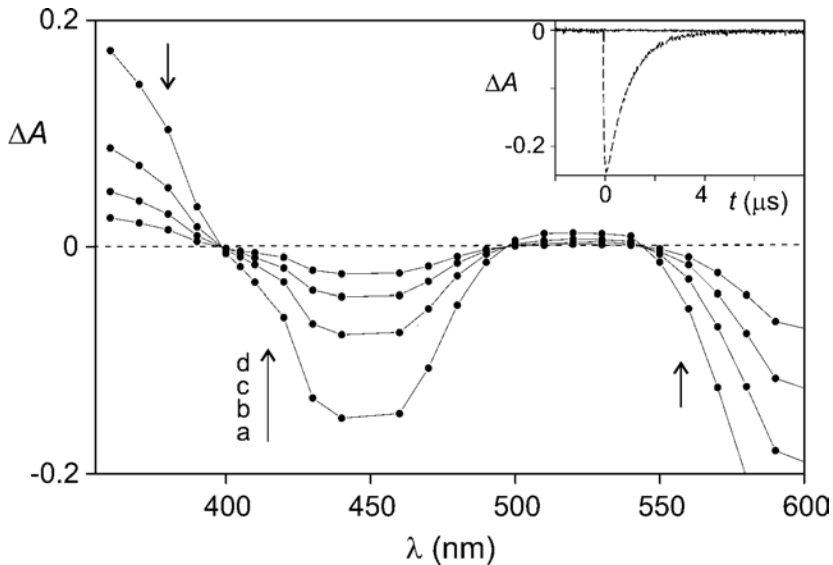

Supplement: pnas_0509011103_2.pdf [file pnas_0509011103_2.pdf]

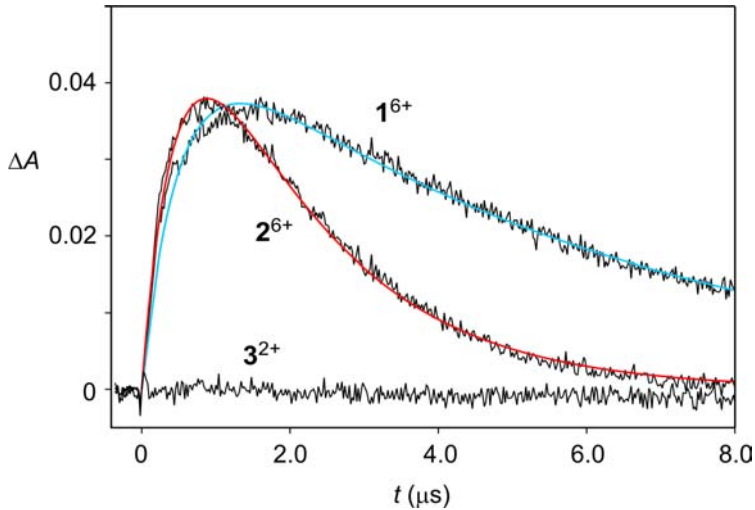

Supplement: pnas_0509011103_3.pdf [file pnas_0509011103_3.pdf]

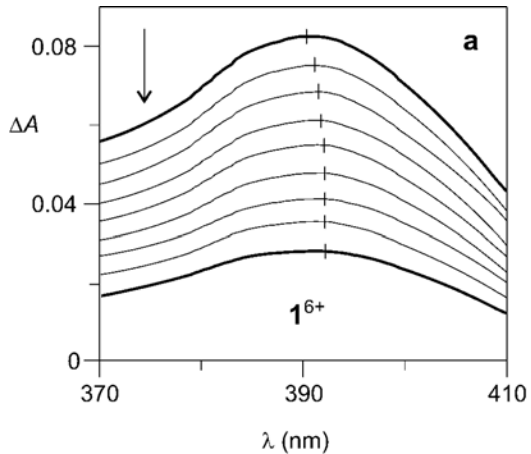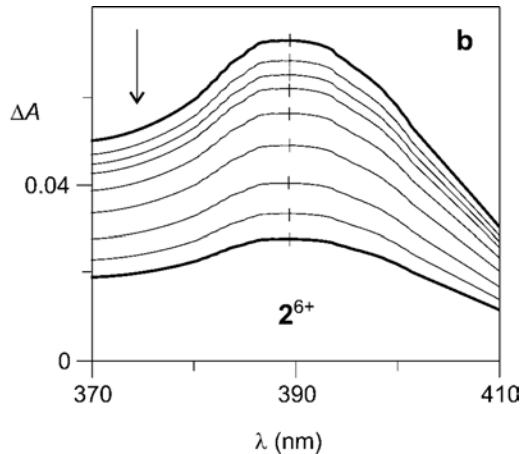

Supplement: pnas_0509011103_4.pdf [file pnas_0509011103_4.pdf]

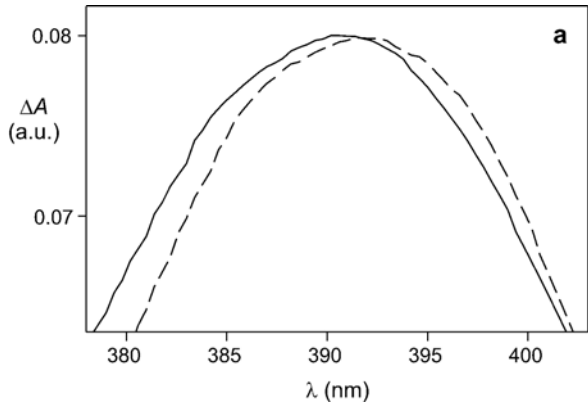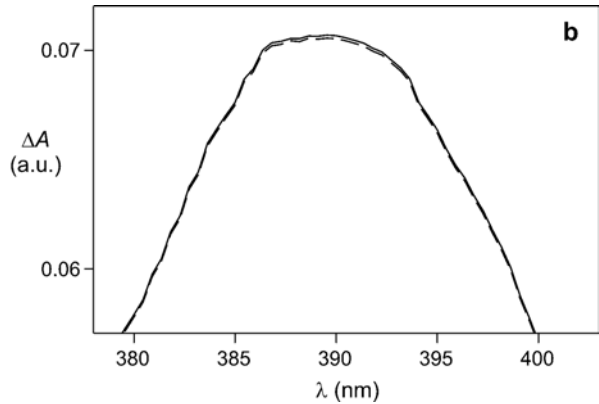

Supplement: pnas_0509011103_5.pdf [file pnas_0509011103_5.pdf]

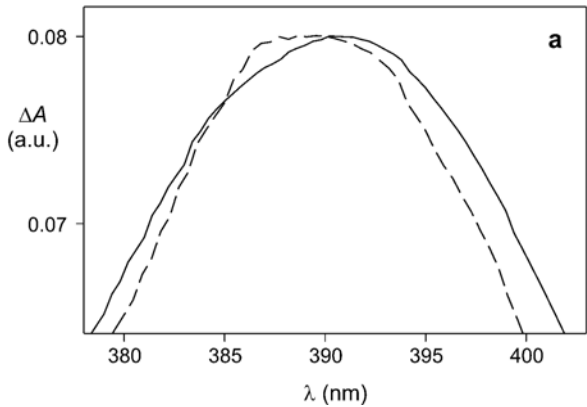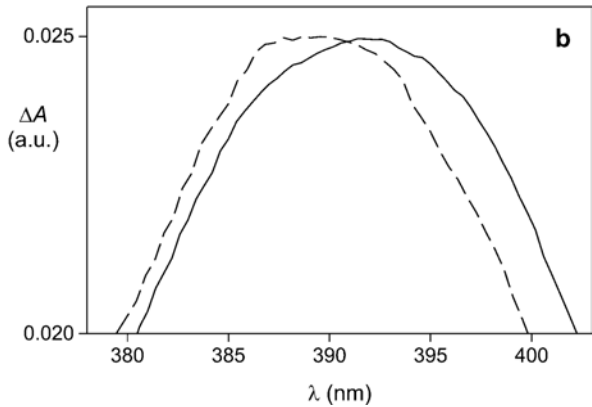

Supplement: pnas_0509011103_6.pdf [file pnas_0509011103_6.pdf]

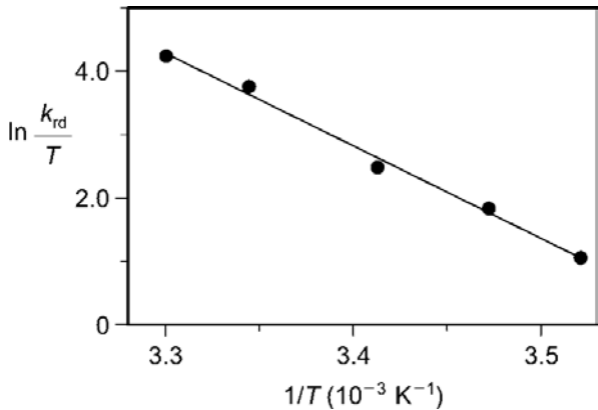

Supplement: pnas_0509011103_7.pdf [file pnas_0509011103_7.pdf]

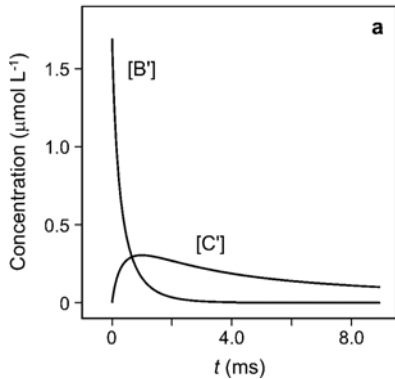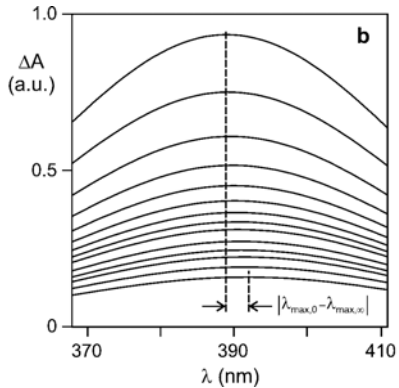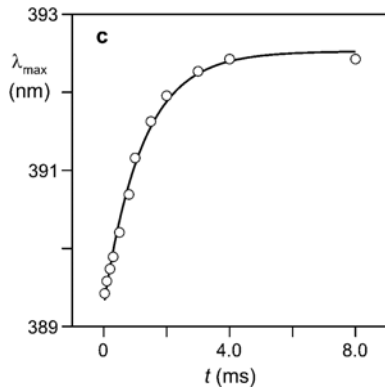

Supplement: pnas_0509011103_8.pdf [file pnas_0509011103_8.pdf]

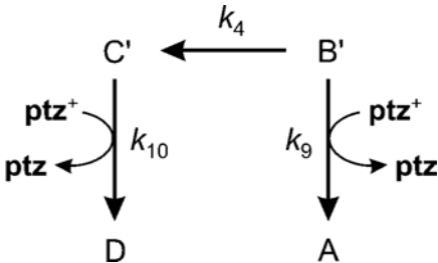

Supplement: pnas_0509011103_9.pdf [file pnas_0509011103_9.pdf]
